# Supplementary material for: Prioritization of candidate genes for a South African family with Parkinson’s disease using in-silico tools
Source: PubMed Central journal article supplement (PMC7997022; doi:10.1371/journal.pone.0249324), 2021-03-26
Supplement: pone.0249324.s001.pdf [file pone.0249324.s001.pdf]

**S1 Table.** Clinical and demographic information on members of a South African family with Parkinson’s disease

|                             | Affected                                                |                                                                    |                                     |                     |                                                  | Unaffected |      |        |       |
|-----------------------------|---------------------------------------------------------|--------------------------------------------------------------------|-------------------------------------|---------------------|--------------------------------------------------|------------|------|--------|-------|
| <b>Individual ID</b>        | III-8                                                   | III-7                                                              | IV-2                                | III-6               | III-2                                            | III-4      | IV-1 | III-1  | III-5 |
| <b>Gender</b>               | Male                                                    | Male                                                               | Male                                | Female              | Female                                           | Male       | Male | Female | Male  |
| <b>Age in 2021 (years)</b>  | 66                                                      | 72                                                                 | 47                                  | 75                  | 83                                               | 72         | 46   | 74     | 76    |
| <b>Age at evaluation</b>    | 55                                                      | 60                                                                 | 44                                  | 72                  | 77                                               | 62         | 35   | 68     | 67    |
| <b>Age at onset (years)</b> | 48                                                      | 42                                                                 | 37                                  | 70                  | 75                                               | N/A        | N/A  | N/A    | N/A   |
| <b>Childhood symptoms</b>   | Reported to have walked on toes since childhood         | None                                                               | None                                | None                | None                                             | N/A        | N/A  | N/A    | N/A   |
| <b>Initial symptoms</b>     | Muscle spasm in left arm, poor balance, walking on toes | Impaired concentration<br>Weakness of legs, and difficulty walking | Difficulty with walking and balance | Cramping lower legs | Difficulty with fine motor ADL; left hand tremor | N/A        | N/A  | N/A    | N/A   |
| <b>Olfaction</b>            | Impaired                                                | Normal                                                             | Always poor                         | Normal              | Impaired                                         | N/A        | N/A  | N/A    | N/A   |
| <b>Excessive sweating</b>   | No                                                      | Yes                                                                | No                                  | No                  | No                                               | N/A        | N/A  | N/A    | N/A   |

|                                |                                                                        |                                                                   |                              |                |                   |     |     |     |     |
|--------------------------------|------------------------------------------------------------------------|-------------------------------------------------------------------|------------------------------|----------------|-------------------|-----|-----|-----|-----|
| <b>RBD</b>                     | No                                                                     | No                                                                | No                           | No             | Yes               | N/A | N/A | N/A | N/A |
| <b>Orthostatic hypotension</b> | Yes                                                                    | Onset age 45                                                      | No                           | No             | No                | N/A | N/A | N/A | N/A |
| <b>Bladder function</b>        | Mild difficulty                                                        | Normal                                                            | Normal                       | Normal         | Normal            | N/A | N/A | N/A | N/A |
| <b>Constipation</b>            | Yes                                                                    | None                                                              | No                           | No             | Yes               | N/A | N/A | N/A | N/A |
| <b>Sleep impairment</b>        | No                                                                     | Yes                                                               | No                           | No             | Yes               | N/A | N/A | N/A | N/A |
| <b>Dystonia</b>                | Initially walked on toes.<br>Dystonia of left leg after medication     | Dystonic flexion of left arm when walking                         | Facial                       | No             | No                | N/A | N/A | N/A | N/A |
| <b>Tremor</b>                  | Developed later, predominantly action tremor, with intention component | Action/intention                                                  | No                           | No             | Initial complaint | N/A | N/A | N/A | N/A |
| <b>Bradykinesia</b>            | Marked, asymmetrical, predominantly upper limbs                        | Markedly asymmetrical in upper and lower limbs                    | Mild bilateral               | Mild bilateral | Mild bilateral    | N/A | N/A | N/A | N/A |
| <b>Rigidity</b>                | Bilateral cogwheel                                                     | Marked asymmetry                                                  | Mild bilateral, asymmetrical | Normal tone    | Unilateral        | N/A | N/A | N/A | N/A |
| <b>Gait</b>                    | Shuffling gait, with absent arm swing                                  | Broad-based, diminished arm swing                                 | Mild slowing                 | Normal         | Slowed            | N/A | N/A | N/A | N/A |
| <b>Additional findings</b>     | Diminished vibration sense in toes                                     | Diminished vibration and loss of joint position sense in toes. No | Micrographia                 | None           | None              | N/A | N/A | N/A | N/A |

|                                       |                                                   |                                                                                   |                                            |                     |                     |     |     |     |     |
|---------------------------------------|---------------------------------------------------|-----------------------------------------------------------------------------------|--------------------------------------------|---------------------|---------------------|-----|-----|-----|-----|
|                                       |                                                   | evident axonal or demyelinating changes in tibial, peroneal or sural conductions. |                                            |                     |                     |     |     |     |     |
| <b>Total daily dose levodopa (mg)</b> | 1000                                              | 600                                                                               | 0                                          | 0                   | 0                   | N/A | N/A | N/A | N/A |
| <b>Levodopa responsive</b>            | Yes                                               | Yes                                                                               | N/A                                        | N/A                 | Not known           | N/A | N/A | N/A | N/A |
| <b>Blood pressure</b>                 | No orthostatic drop                               | No orthostatic drop                                                               | No orthostatic drop                        | No orthostatic drop | No orthostatic drop | N/A | N/A | N/A | N/A |
| <b>Reflexes</b>                       | Hyperreflexia present                             | Hyperreflexia in lower limbs                                                      | Hyperreflexia in lower limbs, right > left | Normal              | Normal              | N/A | N/A | N/A | N/A |
| <b>Brain CT scan</b>                  | No abnormality except for internal capsule lacune | Not done                                                                          | Not done                                   | Not done            | Not done            | N/A | N/A | N/A | N/A |
| <b>UPDRS</b>                          | 41                                                | 37                                                                                | 16                                         | 11                  | 15                  | N/A | N/A | N/A | N/A |
| <b>MOCA</b>                           | 26                                                | 27                                                                                | 30                                         | 28                  | Not done            | N/A | N/A | N/A | N/A |

ADL, Activities of Daily Living; RBD, REM sleep behavior disorder; MOCA, Montreal Cognitive Assessment; N/A, not applicable; UPDRS, Unified Parkinson Disease Rating Scale
