# Supplementary material for: Prioritization of candidate genes for a South African family with Parkinson’s disease using in-silico tools
Source: PubMed Central journal article supplement (PMC7997022; doi:10.1371/journal.pone.0249324), 2021-03-26
Supplement: pone.0249324.s002.pdf [file pone.0249324.s002.pdf]

**S2 Table.** Summary of whole exome sequencing (WES) metrics in the three affected individuals

|                          | <b>Individual III-7</b> | <b>III-8</b>        | <b>IV-2</b>           |
|--------------------------|-------------------------|---------------------|-----------------------|
| Total number of reads    | 136,048,746             | 127,298,302         | 114,750,902           |
| Non-duplicated reads     | 90,255,052              | 97,195,484          | 85,612,771            |
| Reads aligned to target  | 82,045,320<br>(90,9%)   | 83,570,035<br>(86%) | 74,665,623<br>(87,2%) |
| Mean target coverage (%) | 88.12                   | 79.88               | 71.04                 |
| Total number of variants | 22,318                  | 22,566              | 22,531                |
