# Supplementary material for: Prioritization of candidate genes for a South African family with Parkinson’s disease using in-silico tools
Source: PubMed Central journal article supplement (PMC7997022; doi:10.1371/journal.pone.0249324), 2021-03-26
Supplement: pone.0249324.s005.pdf [file pone.0249324.s005.pdf]

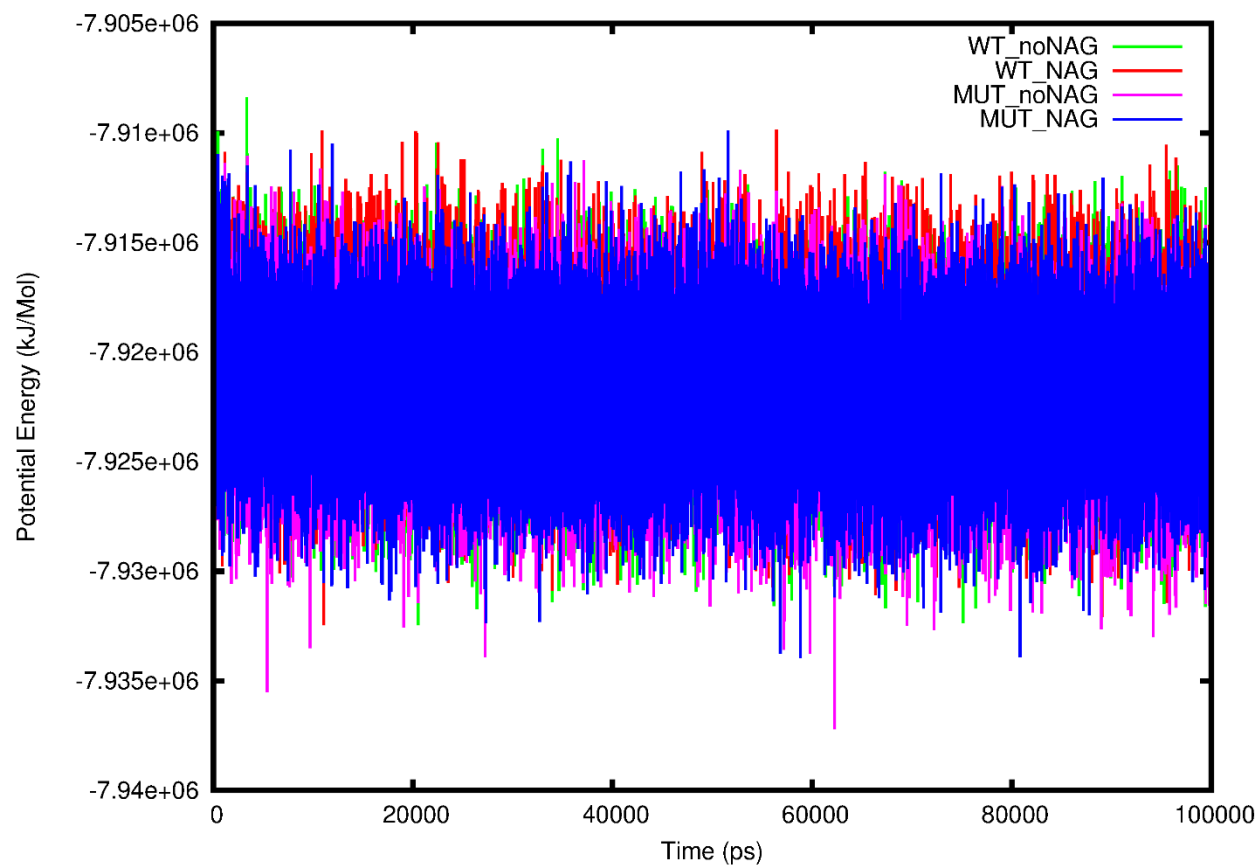

**S2 Fig.** Potential energy of the four systems of NRXN2 (WT\_noNAG, MUT\_noNAG, WT\_NAG and MUT\_NAG) over 100 ns.
