# Supplementary material for: Prioritization of candidate genes for a South African family with Parkinson’s disease using in-silico tools
Source: PubMed Central journal article supplement (PMC7997022; doi:10.1371/journal.pone.0249324), 2021-03-26
Supplement: pone.0249324.s007.pdf [file pone.0249324.s007.pdf]

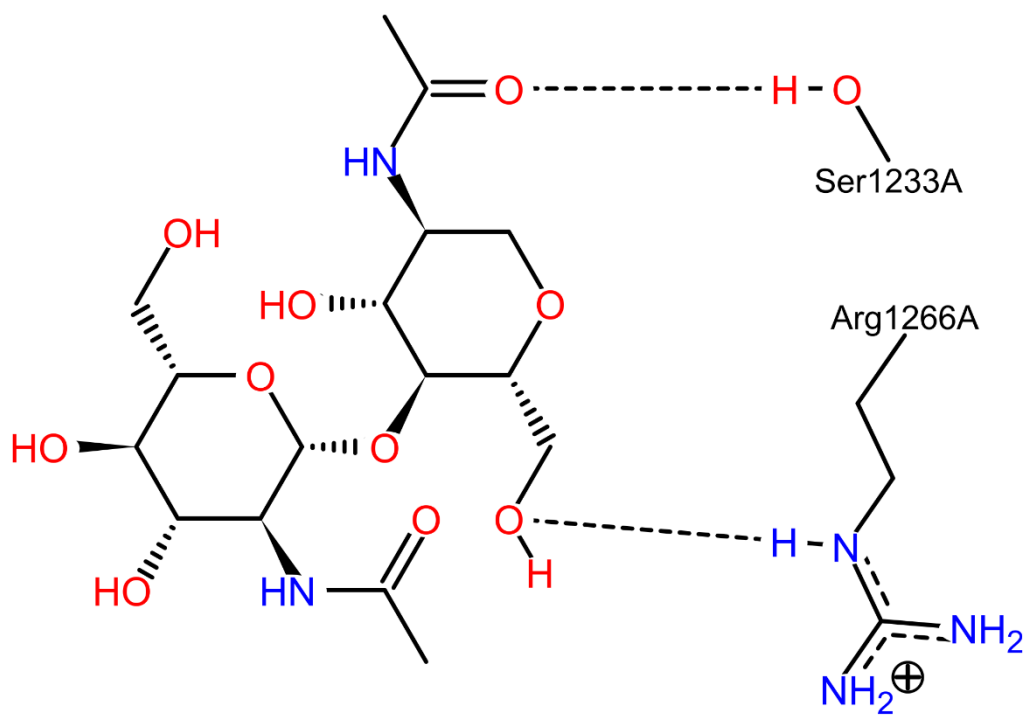

**S4 Fig.** 2D Interaction diagram showing polar contacts formed between NRXN2 residues and sugar moiety NAG. Figure generated using PoseView. Dashed lines show hydrogen bond contacts formed NAG and NRXN2 residues.
