# Supplementary material for: Prioritization of candidate genes for a South African family with Parkinson’s disease using in-silico tools
Source: PubMed Central journal article supplement (PMC7997022; doi:10.1371/journal.pone.0249324), 2021-03-26
Supplement: pone.0249324.s011.pdf [file pone.0249324.s011.pdf]

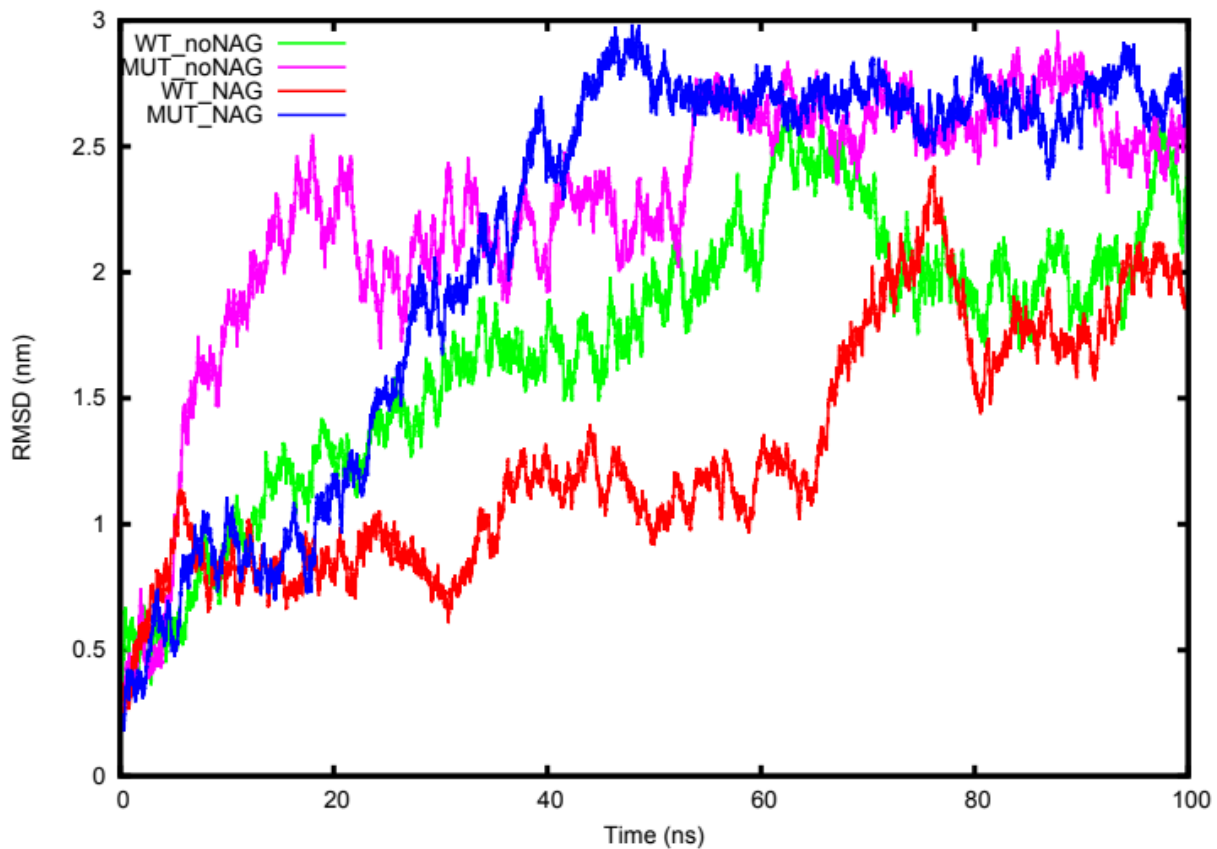

**S8 Fig.** RMSD deviation of the backbone atoms for the four systems of repeat 1 NRXN2. MEAN + STDEV ( $1.71\text{nm} \pm 0.52$ ,  $2.26\text{nm} \pm 0.52$ ,  $1.27\text{nm} \pm 0.46$  and  $2.14\text{nm} \pm 0.79$ ). Line colors: WT\_noNAG = green, MUT\_noNAG = light magenta, WT\_NAG = red and MUT\_NAG = blue.
