# Supplementary material for: Prioritization of candidate genes for a South African family with Parkinson’s disease using in-silico tools
Source: PubMed Central journal article supplement (PMC7997022; doi:10.1371/journal.pone.0249324), 2021-03-26
Supplement: pone.0249324.s015.pdf [file pone.0249324.s015.pdf]

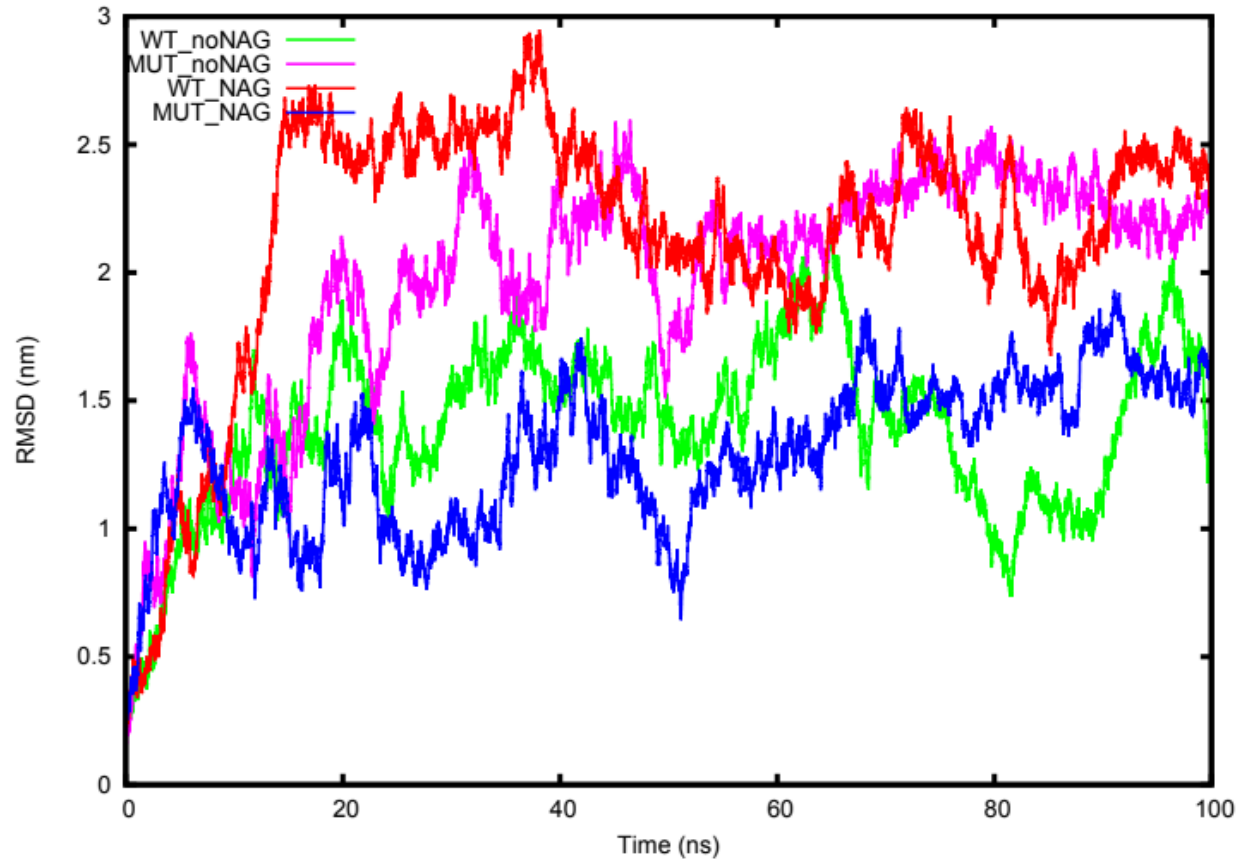

**S12 Fig.** RMSD deviation of the backbone atoms for the four systems of repeat 2 NRXN2, ( $1.40\text{nm} \pm 0.33$ ,  $1.98\text{nm} \pm 0.45$ ,  $2.15\text{nm} \pm 0.51$  and  $1.29\text{nm} \pm 0.29$ ). Line colors: WT\_noNAG = green, MUT\_noNAG = light magenta, WT\_NAG = red and MUT\_NAG = blue.
